# Supplementary material for: Fiber, monolithic fiber and twisted fiber structures: efficient microwave absorption via surface-modified carbon nanotube buckypaper/silicon carbide-based self-sealing layered composites
Source: Royal Society of Chemistry journal article supplement (doi:10.1039/d3ta06676b), 2024-01-01
Supplement: d3ta06676b1.pdf [file d3ta06676b1.pdf]

## Supporting Information

# **Fiber, monolithic fiber and twisted fiber structures: Efficient microwave absorption via surface-modified carbon nanotube buckypaper/silicon carbide-based self-sealing layered composites**

Siyu Guo <sup>a</sup>, Yanzhi Cai <sup>a,\*</sup>, Laifei Cheng <sup>b</sup>, Shaohua Huang <sup>a</sup>, Tingting Liu <sup>a</sup>,  
Haiming Yu <sup>a</sup>, Dengpeng Chen <sup>a</sup>, Yuhan Wang <sup>a</sup>, Zhongyi Hu <sup>a</sup>, Yuan Zhou <sup>a</sup>

<sup>a</sup> College of Materials Science and Engineering, Xi'an University of Architecture  
and Technology, Xi'an, Shaanxi 710055, P. R. China

<sup>b</sup> Science and Technology on Thermostructure Composite Materials Laboratory,  
Northwestern Polytechnical University, Xi'an, Shaanxi, 710072, P. R. China

\* To whom correspondence should be addressed:

Prof. Yanzhi Cai

E-mail: caiyanzhi@xauat.edu.cn

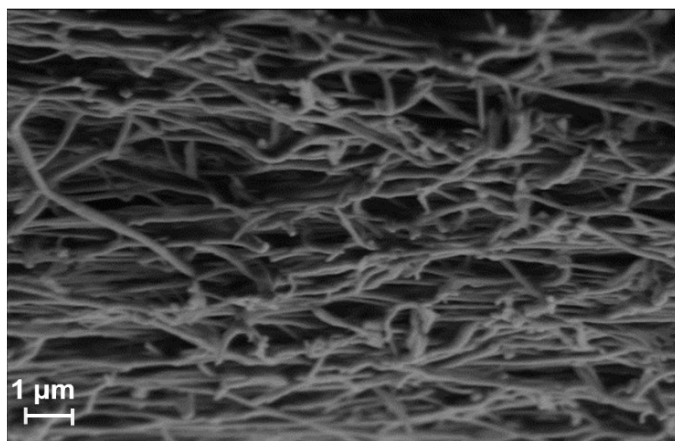

**Fig. S1.** SEM image of the PCS nanofiber film.

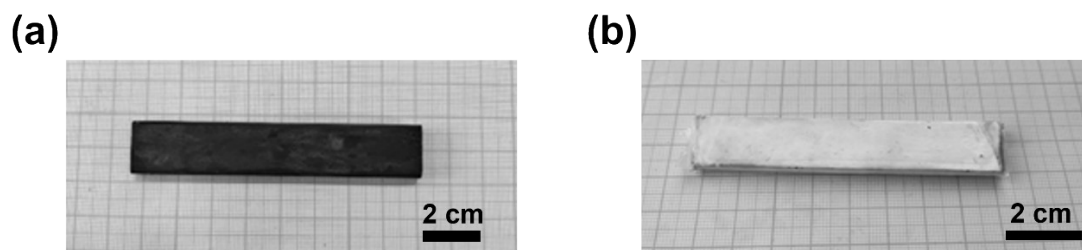

**Fig. S2.** Macroscopic images of CSSL substrates: **a** before and **b** after PCS nanofiber films cladding.

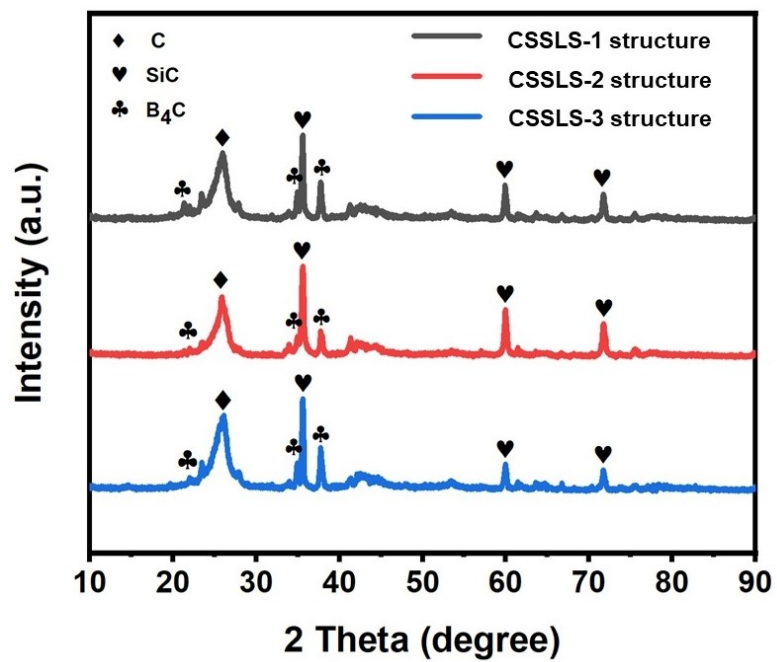

Fig. S3. XRD spectra of CSSLS composites.
